# Supplementary material
Source: HighWire-hosted journal article supplement (https://sit.bmj.com/highwire/filestream/319/field_highwire_adjunct_files/0/bmjsit-2020-000072supp001_data_supplement.pdf)
Supplement: bmjsit-2020-000072supp001_data_supplement.pdf [file bmjsit-2020-000072supp001_data_supplement.pdf]

**APPENDICES****APPENDIX 1****Covariates:**

Previously validated algorithms were used to identify patients with the following diagnoses within the administrative data:

| <b>Comorbidity</b>                              | <b>Sensitivity %</b>                          | <b>Specificity %</b> | <b>Reference</b> |
|-------------------------------------------------|-----------------------------------------------|----------------------|------------------|
| Diabetes                                        | 86.0                                          | 97.0                 | 9, 10, 11        |
| Hypertension                                    | 72.0                                          | 95.0                 | 12               |
| Chronic Obstructive<br>Pulmonary Disease (COPD) | 57.5                                          | 95.4                 | 13               |
| Congestive Heart Failure<br>(CHF)               | 84.8                                          | 97.0                 | 14               |
| Coronary Artery disease<br>(CAD)                | 88.8                                          | 92.8                 | 15, 16           |
| Dementia                                        | 79.3                                          | 99.1                 | 17               |
| Frailty                                         | The Johns Hopkins ACG®<br>System (Version 10) |                      | 8                |

**References**

8. Weiner JP, Abrams C. The Johns Hopkins ACG® System: Technical Reference Guide Version 10.0. 2011.
9. Leong A, Dasgupta K, Bernatsky S, et al. Systematic review and meta-analysis of validation studies on a diabetes case definition from health administrative records. *PLoS One*. 2013 Oct 9;8(10):e75256.
10. Hux JE, Ivis F, Flintoft V, et al. Diabetes in Ontario: determination of prevalence and incidence using a validated administrative data algorithm. *Diabetes care*. 2002;25(3):512.

11. Lipscombe LL, Hwee J, Webster L, et al. Identifying diabetes cases from administrative data: a population-based validation study. *BMC Health Serv Res*. 2018 May 2;18(1):316.
12. Tu K, Campbell NR, Chen ZL, et al. Accuracy of administrative databases in identifying patients with hypertension. *Open medicine*. 2007;1(1):e18.
13. Gershon A, Wang C, Guan J, et al. Identifying individuals with physician diagnosed COPD in health administrative databases. *COPD*. [Comparative Study Research Support, Non-U.S. Gov't]. 2009 Oct;6(5):388-94.
14. Ko DT, Mamdani M, Alter DA. Lipid-lowering therapy with statins in high-risk elderly patients: the treatment-risk paradox. *Jama*. 2004;291(15):1864.
15. Roffi M, Mukherjee D. Treatment-risk paradox in acute coronary syndromes *Eur Heart J*. 2018 Nov 7;39(42):3807-3809
16. Austin PC, Daly PA, Tu JV. A multicenter study of the coding accuracy of hospital discharge administrative data for patients admitted to cardiac care units in Ontario. *Am Heart J*. 2002;144(2):290-296.
17. Jaakkimainen RL, Bronskill SE, Tierney MC, et al. Identification of Physician-Diagnosed Alzheimer's Disease and Related Dementias in Population-Based Administrative Data: A Validation Study Using Family Physicians' Electronic Medical Records. *J Alzheimers Dis*. 2016;54(1):337-349.
